# Supplementary material for: Drug Discovery for Schistosomiasis: Hit and Lead Compounds Identified in a Library of Known Drugs by Medium-Throughput Phenotypic Screening
Source: PLoS Negl Trop Dis. 2009 Jul 14;3(7):e478. doi: 10.1371/journal.pntd.0000478 (PMC2702839; doi:10.1371/journal.pntd.0000478)
Supplement: Table S2 — Phenotypes recorded against S. mansoni adults at 1 µM in vitro with those hit compounds that arose in screens against schistosomula. (0.05 MB XLS) [file pntd.0000478.s002.xls]

## Sheet: Sheet1
Table S2 Phenotypes recorded against S. mansoni adults at 1 µM in vitro with those hit compounds that arose in screens against schistosomula
Common Name	HIT and phenotype or NO HITa	50% Lethal Dose (LD50) of hit compound, if availableb	Therapy/Target (if known)	Hit Compound Availability	GO / NO GO to animal model based on speed of phenotype appearance, phenotype severity, and available LD50 and clinical data
2,3,29-triacetoxy-24-nor-1,3,5,7-friedelatetraene	HIT: Slow after 7 h progressing to slow, dark, sexes separate after 24 h; dying by 4 d (1/2)				NO GO at this time: chemically related to celastrol but with weaker phenotype
Alexidine hydrochloride	NO HIT (2/2)				NO GO
Amitriptyline hydrochloride	NO HIT (2/2)				NO GO
Amphotericin b	NO HIT (2/2)				NO GO
Anisomycin	HIT: on sides after 24 h progressing to dark, on sides by 3 d (2/2)	LD50 (oral-mouse): 148 mg/kg; LD50 (IP-mouse): 400 mg/kg	Antibiotic produced by Streptomyces griseolus	Various vendors	GO
Benztropine mesylate	NO HIT (2/2)				NO GO
Bithionol	HIT: Slow, on sides after 24 h progressing to slow, dark, on sides by 3 d (2/2)	LD50 (oral-mouse): 760 mg/kg; LD50 (IP-mouse): 100 mg/kg	Known flukicide. No apparent effect on schistosome egg counts in patients (Farag et al., 1988. Am. J. Trop. Med. Hyg. 91:240)	Sigma-Aldrich	NO GO at this time: literature suggests lack of efficacy
Celastrol	HIT: slow, dark shrunken by 24 h progressing to slow, dark, death by 48 h (2/2)	For celastrol-methylether: LD50 (oral-mouse): 8 g/kg; LD50 (IP-mouse): 200 mg/kg; no effect to mice after 3 mg/kg p.o. (Allison et al., 2001; Prog Neuropsychopharmacol Biol Psychiatry. 25:1341)	Antioxidant, anti-inflammatory, possible treatment for neurodegenerative disease; a quinone methide triterpene derived from the medicinal plant Tripterygium wilfordii	http://www.gaiachem.com/prods.html	NO GO: death of mice within one day of a single 10 mg/ kg i.p. dose (R. Swenerton, unpubl.)
Chlorpromazine hydrochloride	HIT: Overactive after 7 h without progression (2/2)	LD50 (oral -rat): 225mg/kg; LD50 (oral -rat):141 mg/kg; LD50 (oral - mouse): 135mg/kg; LD50 (oral - mouse): 376mg/kg	Treatment of schizophrenia, control nausea and vomiting; a sedative; controls the manifestations of manic depression.	Various vendors	NO GO at this time: lacks a death phenotype outcome in addition to likely CNS effects
Chlorprothixene hydrochloride	WEAK HIT: Transient overactivity up to 24 h (2/2)				NO GO
Clofoctol	NO HIT (2/2)				NO GO
Clomiphene citrate	NO HIT (1/1)				NO GO
Clomipramine hydrochloride	WEAK HIT: Transient overactivity up to 24 h (1/2)				NO GO
Cyclobenzaprine hydrochloride	WEAK HIT: Transient overactivity up to 24 h (1/2)				NO GO
Cyclosporin A	STRONG HIT: Overactive after 7 h progressing to slow on sides by 3 d (1/2)	LD50 (oral-mouse): 2329 mg/kg; LD50 (IP-rat): 147 mg/kg	Known anthelmintic/schistosomicide/anti-protozoal. An immunesuppressant.	http://www.rspharmchem.com/cyclosporin-a.htm	NO GO: an immunosuppressant
Cytochalasin q	NO HIT (2/2)				NO GO
Diffractaic acid	STRONG HIT: Slow, dark, on sides after 7 h progressing to death by 3 d (2/2)	LD50 (oral-mouse): 962 mg/kg	Lichen metabolite (Usnea spp.)	http://www.gaiachem.com/prods.html	GO
Digitonin	HIT: Slow, dark after 24 h without progression (1/2)	LD50 (oral-mouse): 90 mg/kg; LD10 (IP-mouse): 20 mg/kg	A glycoside obtained from Digitalis purpurea; used as a detergent to solubilizes lipids; mutagen .	Various vendors	NO GO: a mutagen
Dihydrocelastryl diacetate	HIT: sexes separate, dark after 24 h progressing to slow, dying after 3 d (2/2)		Related to Celastrol		NO GO: chemically related to celastrol which is toxic
Dihydrogambogic acid	HIT: slow, on sides after 3 d (1/2)		A xanthone derived from the resin of the Garcinia hanburyi	http://www.gaiachem.com/prods.html	NO GO: chemically related to gambogic acid, but with a weaker phenotype
Dihydrorotenone	NO HIT (2/2)				NO GO
Doxepin hydrochloride	HIT: Overactive after 7 h without progression (2/2)	LD50 (oral-mouse): 180 mg/kg; LD50 (IP-mouse): 79 mg/kg	A tricyclic antidepressant of the dibenzazpine type to treat depression, anxiety and, topically, pruritus associated with eczema.	Various vendors	NO GO: chemically related to imipramine but with a lower LD50
Dyclonine hydrochloride	NO HIT (1/1)				NO GO
Epoxygedunin	NO HIT (1/1)				NO GO
Ergonovine maleate	NO HIT (1/1)				NO GO
Ethinyl estradiol	HIT: Overactive after 24 h progressing to dark, slow by 4 d (1/2)	LD50 (oral-mouse): 950 mg/kg; LD50 (IP-mouse): 250 mg/kg	Treatment of vasomotor symptoms associated with menopause, female hypogonadism, prostatic carcinoma-palliative therapy of advanced disease, breast cancer, oral contraceptive, and emergency contraceptive.	http://www.caymanchem.com/	NO GO : a hormone
Fluoxetine hydrochloride	WEAK HIT: Transient overactivity up tp 24 h (2/2)				NO GO
Gambogic acid	STRONG HIT: Slow, on sides by 7 h progressing to slow, dark on sides, shrunken by 24 h and dying by 4 d (2/2)	LD50 (IV- mouse): 43 - 48 mg/kg (Gou et al., 2006). Basic & Clinical Pharmacology & Toxicology 2006, 99, 178–184. LD50 (subcut-mouse): 354 mg/kg; LD50 (IP-rat): 88 mg/kg	Xanthone derived from the resin of the Garcinia hanburyi	http://www.gaiachem.com/prods.html	GO
Gramicidin	NO HIT (2/2)				NO GO
Hycanthone	HIT: on sides, slow after 48 h progressing to shrunken, dying by 4 d (2/2)	LD50 (oral-mouse): 1120 mg/kg; LD50 (subcut-mouse): 270 mg/kg	Thioxanthene derivative of lucanthone with anti-schistosomal activity and potential antineoplastic activity; Effective against S. mansoni and S. haematobium; Ineffective against S. japonicum. Hepatotoxic.	Sigma-Aldrich	NO GO: former drug therapy but hepatotoxic
Imipramine hydrochloride	HIT: Overactive after 7 h without progression (2/2)	LD50 (oral-mouse): 275 mg/kg; LD50 (IP-mouse): 104 mg/kg	Trucyclic antidepressant of the dibenzazapine class, Norepinephrine-Reuptake Inhibitor; Adrenergic Uptake Inhibitor	Sigma-Aldrich	NO GO at this time: possible CNS effects
Isorotenone	NO HIT (2/2)				NO GO
Lasalocid sodium	STRONG HIT: Slow, dark, on sides after 7 h progressing to dying, teg. blebs by 4 d (2/2)	LD50 (oral -mouse): 146 mg/kg; LD50 (IP-mouse): 64 mg/kg	Cationic ionophore antibiotic from Streptomyces lasaliensis that, among other effects, dissociates the calcium fluxes in muscle fibers. A coccidiostat, especially in poultry.	Obtained upon specific request from Alpharma Inc.	GO
Methomyl	NO HIT (1/1)				NO GO
Miconazole nitrate	NO HIT (1/1)				NO GO
Monensin sodium (monensin a is shown)	HIT: Slow, on sides after 48 h without progression (1/2)	LD50 (oral-mouse): 44 mg/kg; TDLo (oral-mouse): 409 mg/kg/13W-C	Ionophore used as antiprotozoal, antibacterial, antifungal	Calbiochem, Sigma-Aldrich	NO GO: chemically related to lasalocid with lower IP LD50
Neostigmine bromide	NO HIT (2/2)				NO GO
Niclosamide	STRONG HIT: Slow, shrunken after 7 h progressing to dying, teg. blebs by 2 d (2/2)	LD50 (oral-mouse): 1500 mg/kg; LD50 (IP-mouse): 210 mg/kg (Andrews et al., 1983; Pharmac. Ther. 19:245)	Known anthelmintic/molluscicide. Prevents penetration of schistosome cercariae.	Sigma-Aldrich	GO: however, limited oral bioavailability
Nigericin sodium	HIT: Slow, on sides after 24 h progressing to slow, dark, shrunken by 3 d (2/2)	LD50 (IP-mouse): 48 mg/kg	An antibiotic derived from Streptomyces hygroscopicus;	Sigma-Aldrich	NO GO: chemically related to lasalocid but with a lower oral LD50
Perseitol	NO HIT (1/1)				NO GO
(-)-Physostigmine	NO HIT (2/2)				NO GO
Praziquantel	STRONG HIT: Extremely shrunken, dark, slow, tegumental blebs by 7 h progressing to dying by 48 h (2/2)	LD50 (oral-mouse): 2454 mg/kg; LD50 (IP-mouse): 376 mg/kg	Known anthelmintic and current therapy for schistosomiasis	Various vendors	CURRENT DRUG THERAPY: used as 'gold standard' drug in infected mice
Prazosin hydrochloride	NO HIT (1/1)				NO GO
Promazine hydrochloride	HIT: Overactive after 7 h without progression (2/2)	LD50 (subcut-mouse): 300 mg/kg; LD50 (IM-mouse): 28 mg/kg; LD50 (oral-rat): 400 mg/kg; LDLo (IP-rat): 356 mg/kg	A phenothiazine with antipsychotic, antiemetic; neuroleptic effects. Action similar to chlorpromazine w/ less antipsychotic activity;	Sigma-Aldrich	NO GO at this time: lacks a death phenotype outcome in addition to likely CNS complications
Pyrromycin	NO HIT (1/1)				NO GO
Pyrvinium pamoate	HIT: Teg bleb by 24 h progressing to death by 4 d (2/2)		A gastro-intestinal anthelmintic	Sigma-Aldrich	NO GO at this time: does not cross GI tract
Rhodomyrtoxin b	STRONG HIT: Shrunken, dark, slow after 7 h progressing to teg. blebs and death by 24 h (2/2)		Antibacterial, cytotoxic activity; from bark extract of Pilidiostigma tropicum (Myrtaceae) from north Queensland, Australia. Low micromolar (2 - 30 µM) in vitro LD50 values against human hepatocellular carcinoma and mammary adenocarcinoma cell lines (Setzer et al., J Mol Model (2006) 12:703.)	http://www.gaiachem.com/prods.html	NO GO at this time: toxicity suggested
Ribostamycin sulfate	NO HIT (2/2)				NO GO
Salinomycin, sodium	HIT: Slow, on sides after 24 h progressing to slow, dark, on sides by 4 d (1/2)	LD50 (oral-mouse): 500 mg/kg; LD50 (IP-mouse): 25 mg/kg	Prevention of coccidiosis in broiler chickens	Sigma-Aldrich	NO GO: chemically related to lasalocid with but a lower i.p. LD50
Sanguinarine chloride	NO HIT (2/2)				NO GO
Sisomicin sulfate	NO HIT (1/1)				NO GO
Taxol	NO HIT (2/2)				NO GO
Thiothixene	NO HIT (2/2)				NO GO
Tomatine	NO HIT (2/2)				NO GO
Triflupromazine hydrochloride	WEAK HIT: Transient overactivity up to 24 h(1/2)				NO GO
Triptonide	Hit: Slow after 24 h progressing to slow, dark, on sides by 3 d (1/2)		Anti-spermatogenic (male antifertility drug); isolated from multiglycosides of Tripterygium wilfordii; immunosuppressive		NO GO at this time: based on properties
(±)-Verapamil hydrochloride	NO HIT (1/1)				NO GO
a Brackets indicate the number of experiments performed for each compound.					5 compounds prioritized for efficacy tests in murine model.
b LD50 data are variously available from http://www.inchem.org/, http://hazard.com/, http://www.drugbank.ca/ or as otherwise stated.
